1 **Genomic analysis of *Mycobacterium tuberculosis* reveals complex etiology of**  
2 **tuberculosis in Vietnam including frequent introduction and transmission of**  
3 **Beijing lineage and positive selection for EsxW Beijing variant**

4

5 **Authors**

6 Kathryn E Holt<sup>1,2,\*</sup>, Paul McAdam<sup>2,^</sup>, Phan Vuong Khac Thai<sup>3,^</sup>, Dang Thi Minh Ha<sup>3</sup>,  
7 Nguyen Ngoc Lan<sup>3</sup>, Nguyen Huu Lan<sup>3</sup>, Nguyen Thi Quynh Nhu<sup>4</sup>, Nguyen Thuy  
8 Thuong Thuong<sup>4,5</sup>, Guy Thwaites<sup>4,5</sup>, David J Edwards<sup>1,2</sup>, Kym Pham<sup>6</sup>, Jeremy  
9 Farrar<sup>4,5</sup>, Chiea Chuen Khor<sup>7</sup>, Yik Ying Teo<sup>8,9</sup>, Michael Inouye<sup>1,10</sup>, Maxine Caws<sup>11,^</sup>,  
10 Sarah J Dunstan<sup>12,1,\*,^</sup>

11

12 <sup>1</sup>Centre for Systems Genomics, University of Melbourne, Parkville, Victoria 3010,  
13 Australia

14 <sup>2</sup>Department of Biochemistry and Molecular Biology, Bio21 Molecular Science and  
15 Biotechnology Institute, University of Melbourne, Parkville, Victoria 3010, Australia

16 <sup>3</sup>Pham Ngoc Thach Hospital for Tuberculosis and Lung Disease, Ho Chi Minh City,  
17 District 5, Viet Nam

18 <sup>4</sup>Oxford University Clinical Research Unit, Ho Chi Minh City, District 5, Viet Nam

19 <sup>5</sup>Centre for Tropical Medicine, Nuffield Department of Clinical Medicine, Oxford  
20 University, Oxford, UK.

21 <sup>6</sup>Department of Pathology, University of Melbourne, Parkville, Victoria 3010,  
22 Australia

23 <sup>7</sup>Genome Institute of Singapore, Singapore

24 <sup>8</sup>Department of Statistics and Applied Probability, National University of Singapore,  
25 Singapore.

26 <sup>9</sup>Saw Swee Hock School of Public Health, National University of Singapore,  
27 Singapore

28 <sup>10</sup>School of BioSciences, University of Melbourne, Parkville, Victoria 3010, Australia

29 <sup>11</sup>Liverpool School of Tropical Medicine, Liverpool, UK

30 <sup>12</sup>Peter Doherty Institute for Infection and Immunity, University of Melbourne,  
31 Parkville, Victoria 3010, Australia

32

33

34 ^ These authors contributed equally to this work

35 \* Corresponding authors

36 Correspondence should be addressed to KEH ([kholt@unimelb.edu.au](mailto:kholt@unimelb.edu.au)) and SJD  
37 ([sarah.dunstan@unimelb.edu.au](mailto:sarah.dunstan@unimelb.edu.au))

38

## 39     **Introduction**

40     Tuberculosis (TB) is a leading cause of death from infectious disease and the global  
 41     burden is now higher than at any point in history <sup>1,2</sup>. Despite coordinated efforts to  
 42     control TB transmission, the factors contributing to its successful spread remain  
 43     poorly understood. Vietnam is identified as one of 30 high burden countries for TB  
 44     and MDR-TB with an incidence of 137 TB cases per 100,000 individuals in 2015 <sup>2</sup>.  
 45     Recent phylogenomic analyses of the causative agent *Mycobacterium tuberculosis*  
 46     (*Mtb*) in other high-prevalence regions have provided insights into the complex  
 47     processes underlying TB transmission <sup>3-5</sup>. Here we examine the transmission  
 48     dynamics of *Mtb* isolated from TB patients in Ho Chi Minh City (HCMC), Vietnam  
 49     via whole genome analysis of 1,635 isolates and comparison with 3,085 isolates from  
 50     other locations. The genomic data reveal an underlying burden of disease caused by  
 51     endemic *Mtb* Lineage 1 associated with activation of long-term latent infection, on  
 52     top of which is overlaid a three-fold higher burden associated with introduction of  
 53     exotic Lineage 2 and 4 *Mtb* strains. We identify frequent transfer of Beijing lineage  
 54     *Mtb* into the country, which are associated with higher levels of transmission in this  
 55     host population than endemic Lineage 1 *Mtb*. We identify a mutation in the secreted  
 56     protein EsxW in Beijing strains that also appears to be under positive selection in  
 57     other *Mtb* lineages, which could potentially contribute to the enhanced transmission of  
 58     the Beijing lineage in Vietnamese and other host populations.

59

60

61 To characterize the diversity of *Mtb* circulating in HCMC, we sequenced the genomes  
 62 of 1,635 isolates (**Supplementary Table 1**) obtained from 2,091 HIV uninfected,  
 63 smear positive adults ( $\geq 18$  years) commencing anti-TB therapy at district TB units  
 64 (DTUs) in eight districts of HCMC between December 2008 and July 2011 (see  
 65 **Methods**). A total of 73,718 high quality SNPs were identified and used to  
 66 reconstruct a maximum likelihood (ML) phylogeny (**Fig. 1a**) and to assign lineages<sup>6</sup>.  
 67 Four major lineages (Lineages 1-4) were present within the study population. The  
 68 majority of isolates (n=957, 59%) belonged to lineage 2.2.1, a subgroup of the Beijing  
 69 lineage (2.2). Lineage 1 (Indo-Oceanic lineage; n=388, 23.7%) and Lineage 4 (Euro-  
 70 American lineage; n=192, 11.7%) were also common. A single isolate belonged to  
 71 Lineage 3 (East African-Indian lineage) and was excluded from further analysis. The  
 72 distribution of lineages did not change during the 2.5 year period of the study (**Fig.**  
 73 **1b**), and was in agreement with previous genotyping (MIRU-VNTR, spoligotyping)  
 74 studies in urban areas of Vietnam ( $\geq 50\%$  Beijing lineage (2.2) and  $\sim 20\%$  Lineage  
 75 1.1/EIA in Hanoi and HCMC, 1998-2009)<sup>7-11</sup>. Known antimicrobial resistance  
 76 mutations were detected in all lineages but were most frequent in Beijing sublineage  
 77 2.2.1 (**Table 1**), consistent with earlier reports from Vietnam<sup>7-9,11</sup>.

78  
 79 Whilst the majority of TB patients were male (74%, typical for TB studies in Vietnam  
 80 and elsewhere<sup>8-10</sup>), the Beijing lineage was significantly associated with TB in  
 81 females (OR 1.28 [95% CI 1.01-1.62], p=0.043 using Fisher's exact test; see **Table**  
 82 **1**). Beijing sublineage 2.2.1 was also significantly associated with younger people: its  
 83 frequency declined with age, from 74% of cases in  $<20$  year olds vs 50% in  $\geq 60$  year  
 84 olds (p=0.0023 Fisher's exact test, p=0.0024 linear trend test; **Fig. 1c**). In contrast,  
 85 Lineage 1 was significantly associated with males (25% of male cases vs 19% of

86 females,  $p=0.017$ ) and increased with age regardless of gender, from 12% in <20 year  
 87 olds vs 35% in  $\geq 60$  year olds ( $p=0.0007$  Fisher's exact test,  $p=0.0014$  linear trend test;  
 88 **Fig. 1c**). These data confirm that Beijing sublineage 2.2.1 is capable of infecting a  
 89 wider range of hosts in the Vietnamese population, particularly among females and  
 90 younger people, than is the endemic Lineage 1<sup>7-10</sup>.  
 91  
 92 Consequently, we hypothesised that Beijing lineage or sublineage 2.2.1 was also more  
 93 transmissible than Lineage 1, and/or more capable of causing active disease in  
 94 infected hosts, in the Vietnamese host population. We used the whole genome  
 95 phylogeny to investigate this possibility in more detail, comparing several diversity  
 96 metrics for each lineage (**Fig. 2, Supplementary Fig. 1**). Terminal branch lengths,  
 97 which represent the upper bound of time since transmission for each *Mtb* case, were  
 98 significantly shorter for Beijing sublineage 2.2.1 *Mtb* isolates (median 8 SNPs) than  
 99 for non-Beijing lineage isolates (Lineage 1: median 53 SNPs,  $p < 1 \times 10^{-15}$  using  
 100 Kolmogorov-Smirnov test; Lineage 2.1: 30 SNPs,  $p < 1 \times 10^{-6}$ ; Lineage 4: 17 SNPs,  $p$   
 101  $< 1 \times 10^{-9}$ ), and slightly shorter than Beijing sublineage 2.2.2 isolates (9 SNPs,  
 102  $p=0.02$ ) (**Fig. 2a**). Indeed the distribution of mean node-to-tip distances for all  
 103 internal nodes was skewed significantly lower within the Beijing sublineage 2.2.1  
 104 compared to the rest of the tree (median 16 SNPs compared to 62, 57, 39 and 60 SNPs  
 105 for Lineages 1, 2.1, 2.2.2 and 4, respectively;  $p<0.0015$  in all cases). Importantly, for  
 106 subtrees with the same number of descendant tips (i.e. ancestral transmission events  
 107 associated with the same number of subsequently sampled *Mtb* cases), mean subtree  
 108 heights were shorter within the Beijing lineage than in other lineages (**Fig. 2b**).  
 109 Hence Beijing lineage subtrees represent temporally shorter transmission pathways  
 110 than do subtrees of an equivalent size from other lineages. We identified potential

transmission clusters using a range of maximum pairwise patristic distance thresholds to define a cluster (**Fig. 2c**). Beijing sublineage 2.2.1 was responsible for  $\geq 70\%$  of transmission clusters using thresholds of up to 20 SNPs (transmission age of  $\sim 20$  years). Therefore, not only was sublineage 2.2.1 the most common cause of TB in the HCMC study population, but these infections resulted from more recent transmission. Coupled with the difference in age distributions (**Fig. 1**), these data indicate that new cases of Lineage 1 *Mtb* in HCMC typically result from activation of longer-term latent infections, while new cases of Lineage 2.2.1 *Mtb* often result from more recent transmission and shorter time to develop active disease.

120

It has been suggested previously that the Beijing lineage is slowly displacing the resident Lineage 1 strains in Vietnam, following the introduction of the Beijing strain into urban areas and subsequent spread to rural areas where Lineage 1 still dominates<sup>8,10</sup>. Our data are consistent with this and suggest that the Beijing sublineage 2.2.1 isolates from HCMC may represent a locally established epidemic subclade of the Beijing lineage, similar to that previously described in Russia<sup>3</sup>. To investigate this we combined our HCMC *Mtb* genome data with 3,085 publicly available *Mtb* whole genome sequences from Russia<sup>3</sup>, Malawi<sup>4,5</sup>, Argentina<sup>12</sup>, and China<sup>13</sup>, as well as globally dispersed Lineage 2 genomes<sup>14</sup> (**Supplementary Table 2**), then inferred phylogenies for Lineages 1, 2 and 4 (**Fig. 3**). Beijing sublineage 2.2.1 isolates from HCMC formed several distinct clusters that each shared a recent common ancestor with Lineage 2.2.1 isolates from outside Vietnam (**Fig. 3b**). Notably, isolates from Russia, Malawi, China and numerous other countries were interspersed throughout the HCMC sublineage 2.2.1 population (**Fig 3b**), suggesting multiple, frequent transfers of this lineage between host populations in HCMC and other geographic regions.

136 HCMC Lineage 4 isolates were drawn from eight of the ten recognised sublineages <sup>6</sup>  
137 – including those identified as specialist, generalist and intermediate in their  
138 geographic range <sup>15</sup> – and were interspersed with isolates from other geographical  
139 locations, consistent with multiple imports into HCMC from external populations  
140 (**Fig. 3c**). In further support of these observations, stochastic mapping of locations  
141 onto the Lineage 2 and 4 phylogenies predicted dozens of strain transfer events  
142 between Vietnam and other locations (**Fig. 3d**) (see **Methods**). In contrast, while  
143 Lineage 1 had a similar frequency amongst Malawian isolates (16% of cases), *Mtb*  
144 isolates from the two locations were not comingled (**Fig. 3a**), suggesting that Lineage  
145 1 associated TB in HCMC results entirely from the local endemic population.  
146  
147 Taken together, our data reveal a complex epidemiological landscape for TB in  
148 HCMC, comprising (i) an underlying burden of disease caused by endemic Lineage 1  
149 *Mtb* strains (24% of all TB cases), which is associated with activation of long-term  
150 latent infection and disproportionately affects men and older people; and (ii) an  
151 additional disease burden caused by introduction of exogenous Lineage 2 and 4 *Mtb*  
152 strains (76% of all TB cases), more often affecting hosts of both genders and a  
153 broader age range and is associated with shorter time to active disease and frequent  
154 onward local transmission (>30% of all introduced strains were involved in  
155 transmission clusters defined using a maximum pairwise patristic distance threshold  
156 of  $\leq 20$  SNPs). Notably, 83% of TB cases resulting from these onward transmission  
157 events involved the Beijing sublineage 2.2.1, accounting for 23% of all cases included  
158 in the genomic study. These findings have important consequences for local TB  
159 control programs, which may benefit from distinct strategies targeting the different  
160 forms of TB that are associated with different *Mtb* lineages, and also highlight the

161 high degree to which international transfer of *Mtb* can impact on local disease burden  
162 and shifting epidemiology.

163

164 The population structure (**Figures 1-2**) provides evidence that Beijing lineage strains  
165 are more transmissible within this HIV-negative HCMC population than are other  
166 *Mtb* lineages. Genomic evidence for enhanced transmission of the Beijing lineage has  
167 been documented in Russia (associated with antimicrobial resistance)<sup>3</sup> and Malawi  
168 (independent of antimicrobial resistance)<sup>4</sup>. While antimicrobial resistance was  
169 common amongst HCMC Beijing lineage isolates, the majority of transmission  
170 clusters comprised groups of isolates that did not share any known resistance  
171 mutations that could account for their transmission success (**Supplementary Fig. 2**).

172 This is consistent with previous reports that the Beijing lineage is highly transmissible  
173 and more likely to progress to active disease in various host populations and is also  
174 more virulent and less pro-inflammatory in various cellular assays, independent of  
175 antimicrobial resistance<sup>16-19</sup>. We therefore aimed to interrogate the *Mtb* genome data  
176 to identify mutations that may contribute to the success of the Beijing lineage (2.2).

177 Evolutionary convergence has previously been used as a signal of positive selection to  
178 identify mutations associated with antimicrobial resistance in *Mtb*<sup>20,21</sup>. We reasoned  
179 that advantageous polymorphisms contributing to the enhanced transmissibility of  
180 Lineage 2.2 should lie on the branch leading to this lineage, and should be under  
181 positive selection that is detectable as convergent evolution at these sites in other  
182 lineages. We identified a total of 420 homoplasic nonsynonymous SNPs (nsSNPs)  
183 across the HCMC phylogeny, the most frequent of which occurred in genes in which  
184 convergent evolution has previously been associated with antimicrobial resistance  
185 including *gidB*, *embB*, *gyrA*, *rpoB*, *rpoC*, and *inhA*<sup>20</sup>. The homoplasic nsSNPs



186 included three that arose on the branch defining Lineage 2.2 and also elsewhere in the  
 187 HCMC tree (**Table 2, Supplementary Fig. 3**). One was a mutation in *EsxW* codon 2,  
 188 which arose on nine other branches (six times in Lineage 4, three times in Lineage 1;  
 189 see **Supplementary Fig. 3**) and showed evidence of onward transmission on four  
 190 occasions. Comparison to the global tree detected the same *EsxW* mutation on a  
 191 further ten Lineage 4 branches in Malawi and Russia, with onward transmission  
 192 detected on six occasions. The other two mutations were in *Rv3081* (conserved  
 193 hypothetical protein) and *GidB* (mutations in which are often associated with  
 194 streptomycin resistance) and arose less frequently (**Table 2**). In contrast, homoplastic  
 195 nsSNPs on the branches defining Lineages 1 or 4 were each detected on only one or  
 196 two other branches in the HCMC tree and no additional branches of the global tree  
 197 (**Supplementary Table 3**). No homoplastic SNPs were associated with sublineage  
 198 2.2.1, and although synonymous or intergenic SNPs can have functional  
 199 consequences, we found no such homoplasies associated with Beijing or other  
 200 lineages.

201  
 202 *EsxW* (Rv3620c) is an ESX-secreted effector protein, which has been proposed as a  
 203 vaccine and immunotherapy candidate<sup>22-24</sup> due to its demonstrated immunogenicity in  
 204 mice and epitopes predicted to bind a wide range of human HLA-DRB1 alleles<sup>22,25</sup>.  
 205 There are 23 *esx* genes in the *Mtb* genome, including 11 clustered pairs of *esx* genes  
 206 whose products form secreted heterodimers. *EsxW* and its heterodimerization partner  
 207 *EsxV* are encoded in adjacent genes in the RD8 locus, which is conserved in all *Mtb*  
 208 genomes but lacking from other members of the *Mtb* complex<sup>26</sup>. *EsxW* is one of five  
 209 close homologs in *Mtb* (differing by 1-2 amino acids) that result from expansion of a  
 210 subfamily of CFP10 homologs (QILSS/ESX-5; **Supplementary Fig. 4**). Despite their

211 close homology, SNPs in these genes can be easily distinguished even with short  
 212 reads, as the upstream sequences are unique and allow unambiguous mapping  
 213 (**Supplementary Fig. 5**). The ancestral form of *Mtb* EsxW carries the polar threonine  
 214 (codon ACC) at residue 2, while all other *Mtb* QILSS proteins carry the hydrophobic  
 215 alanine (GCC) at this position; in the Beijing lineage EsxW residue 2 is reverted to  
 216 alanine (GCC), making the protein identical to EsxJ. Residue two lies in the N-  
 217 terminal loop of EsxW (**Fig. 4**), and the evolutionarily convergent changes at this  
 218 position could have functional impacts such as stabilizing the heterodimer or  
 219 impacting interactions with host proteins. Since the upstream promoter regions of  
 220 EsxW and its homologs differ substantially (**Supplementary Fig. 5**), their expression  
 221 is likely subject to different regulatory controls. While the mechanism remains to be  
 222 elucidated, our results provide evidence that EsxW is under selection in natural *Mtb*  
 223 populations, providing support for the prioritization of this immunomodulatory  
 224 protein as a vaccine target. Importantly, our data show that genomic diversity in *Mtb*  
 225 has a profound impact on TB epidemiology even within a single localized host  
 226 population, and indicates that more detailed understanding of lineage-specific  
 227 variation in *Mtb* could be highly informative for TB control.  
 228

## 229 Accession codes

230 *Mtb* genome data was deposited in NCBI BioProject [ID:PRJNA355614;  
231 <http://www.ncbi.nlm.nih.gov/bioproject/355614>]; individual accession numbers for  
232 *Mtb* genomes analysed in this study are given in **Supplementary Tables 1 and 2**  
233 (data from previous studies).

234

## 235 ACKNOWLEDGMENTS

236 We would like to thank the clinical staff who recruited patients into our study from  
237 the following District TB Units (DTU) in HCMC, Viet Nam; District 1, 4, 5, 6, 8, Tan  
238 Binh, Binh Thanh and Phu Nhuan DTUs; and also our colleagues from Pham Ngoc  
239 Thach Hospital for Tuberculosis and Lung Disease, HCMC Viet Nam. This work was  
240 supported by the National Health and Medical Research Council, Australia (Project  
241 grant #1056689, Fellowship #1061409 to KEH, Fellowship #1061435 to MI),  
242 A\*STAR Biomedical Research Council, Singapore (12/1/21/24/6689) and the  
243 Wellcome Trust UK (research training fellowship #081814/Z/06/Z to MC) and as part  
244 of their Major Overseas Program in Viet Nam (089276/Z/09/Z).

245

## 246 AUTHOR CONTRIBUTIONS

247 SJD, KEH, MC, MI, YYT, CCK, are the study principal investigators who conceived  
248 and obtained funding for the project. SJD provided overall project co-ordination; MI  
249 organized and supervised the DNA sequencing and KEH devised the overall analysis  
250 plan and wrote the first draft of the manuscript along with PM. MC and SJD  
251 established the TB cohort for this genetics study by working with PVKT, DTMH,  
252>NNL, NHL, NTQN, NTTT, GT and JJF to coordinate the collection of clinical  
253 samples and phenotypes. KP performed DNA quality checks and sequencing on all

254 Vietnamese samples. KEH, PM, MI, DJE analyzed the data. All authors critically  
255 reviewed manuscript revisions and contributed intellectual input to the final  
256 submission.

257

## 258 **COMPETING FINANCIAL INTERESTS**

259 The authors declare no competing financial interests.

## 260 **Online Methods**

261 **Bacterial isolates used in this study.** Between December 2008 and July 2011, 2,091  
 262 individuals of the Vietnamese Kinh ethnic group attending the outpatient department  
 263 of Pham Ngoc Thach Hospital or from 8 District Tuberculosis Units (District 1, 4, 5,  
 264 6, 8, Tan Binh, Binh Thanh and Phu Nhuan) in HCMC were recruited into a clinical  
 265 study of TB. Consenting adult patients were recruited on the basis of: (1) sputum  
 266 smear positivity, (2) no evidence of HIV infection, and (3) no prior history of TB  
 267 antibiotic therapy. *Mtb* strains were isolated from the study participants, resulting in a  
 268 culture collection of N=1822 *Mtb* isolates.

269  
 270 **DNA extraction and sequencing.** *Mtb* isolates were subcultured on Lowenstein  
 271 Jensen media and DNA extracted at the Oxford University Clinical Research Unit in  
 272 HCMC using the cetyl trimethylammonium bromide (CTAB) extraction protocol as  
 273 described previously <sup>27</sup>. DNA was successfully obtained from N=1,728 isolates and  
 274 shipped to the University of Melbourne for whole genome sequencing. DNA extracts  
 275 were purified using AxyPrep<sup>TM</sup> Mag PCR Normalizer Protocol prior to library  
 276 preparation. A total of N=1,655 DNA samples passed QC and were subjected to  
 277 library preparation using the Nextera XT protocol. Libraries were quantified using  
 278 Quant-iT PicoGreen (dsDNA kit, Invitrogen), then normalised and pooled to 4 nM  
 279 concentration. DNA underwent 150 bp paired end sequencing (Rapid mode v2) on the  
 280 Illumina HiSeq 2500 platform (Illumina, San Diego). Sequence data was successfully  
 281 generated for N=1,636 *Mtb* isolates from HCMC (representing 90% of those isolated  
 282 from eligible patients in the cohort) with median three million reads per sample,  
 283 providing median 99.2% coverage and 86x depth for each *Mtb* genome  
 284 **(Supplementary Table 1).**

285

286 **Publicly available genome data used in this study.** Illumina *Mtb* genome sequences  
287 from various previously published studies were downloaded from the European  
288 Nucleotide Archive (accessions in **Supplementary Table 2**). A total of 3,085 *Mtb*  
289 genomes were included in the analysis, comprising data from localized studies: 1,032  
290 from Russia <sup>3</sup>, 1,621 from Malawi <sup>4,5</sup>, 248 Argentina <sup>12</sup>, and 78 from China <sup>13</sup>; as well  
291 as 106 globally dispersed Lineage 2 genomes <sup>14</sup>. The H37Rv reference genome  
292 sequence (accession NC\_000962.3) was used for all reference-driven analyses.

293

294 **SNP analysis.** Sequence reads were mapped to the H37Rv reference genome using  
295 the RedDog pipeline v0.5 (<https://github.com/katholt/RedDog>). Briefly, Bowtie2  
296 v2.2.3 was used for read alignment with the sensitive-local algorithm and the  
297 maximum insert length set to 2000 (via the -x parameter) <sup>28</sup> and variant sites (SNPs)  
298 were called using SAMTools v0.1.19 <sup>29</sup>. SNPs located in previously reported  
299 repetitive regions of the genome were excluded prior to phylogenetic analysis <sup>30,31</sup>  
300 (**Supplementary Table 4**); sites for which a definitive allele call could not be made in  
301 at least 99.5% of all isolate sequences were also excluded from the set of SNPs used  
302 for phylogenetic analysis. Two SNP alignments were compiled for analysis: one  
303 comprising the 1,635 HCMC isolates (total 73,718 SNPs), and one comprising all  
304 4,720 isolates (including the HCMC isolates and the global collections downloaded  
305 from public data; total 133,495 SNPs).

306

307 **In silico lineage and antimicrobial resistance typing.** Mykrobe Predictor was used  
308 to analyse raw Illumina reads generated from HCMC *Mtb* isolates and (a) assign each  
309 isolate to one of the seven *Mtb* lineages, and (b) detect known resistance associated

polymorphisms<sup>32</sup> (summarized in **Table 1**, individual mutation calls are provided in **Supplementary Table 1**). All *Mtb* isolates were further assigned to sublineages by comparing SNPs identified using RedDog with those used in the haplotyping scheme defined by Coll *et al.*<sup>6</sup> (lineage assignments are in **Supplementary Tables 1-2**).

**Phylogenomic analyses.** ML phylogenetic trees were inferred using RAxML v7.7.2<sup>33</sup> for (a) all HCMC isolates (presented in **Fig. 1**); and (b) each of lineages 1, 2 and 4 using combined data from the HCMC isolates and available public data (presented in **Fig. 3**; see isolates list in **Supplementary Tables 1-2**). The trees presented are those with the highest likelihood from 5 replicate runs, constructed using the GTR model of nucleotide substitution and a Gamma model of rate heterogeneity to analyse a concatenated alignment of SNP alleles. An approximate ML tree containing all data (HCMC isolates and available public data) was inferred using FastTree v2.1.8<sup>34</sup>. Ancestral sequence reconstruction was performed for the HCMC tree and combined tree using FastML v3.1 to infer the sequence alignment at each internal node of the ML phylogeny<sup>35</sup>. Substitution events occurring on each branch of the tree were extracted by comparing the joint reconstruction sequences for the parent and child nodes; these data were used to identify lineage-specific polymorphisms and to detect independent occurrences of those polymorphisms outside of the lineage of interest (data in **Table 2**). Terminal branch lengths reported are the number of substitutions (SNPs) mapped to each terminal branch (data in **Fig. 2a**). Metrics for genetic diversity and tree topology were calculated from the phylogenies using R (see **Supplementary Fig. 1**). Mean subtree heights were defined as the mean root-to-tip distance for all tips in the subtree; the width of a subtree was defined as the number of descendant tips (data in **Fig. 2b**). Clusters were defined as subtrees for whom the

335 maximum patristic distance between descendant tips (see **Supplementary Fig. 1**) fell  
 336 below a specified threshold (data in **Fig. 2c**). Each cluster was checked to determine  
 337 whether all members of the cluster shared any of the antimicrobial resistance  
 338 mutations identified by Mykrobe Predictor; clusters in which no known antimicrobial  
 339 resistance mutation was conserved in all members of the cluster are reported as not  
 340 explained by antimicrobial resistance (data in **Supplementary Fig. 2**).

341

342 **Phylogeography analysis.** Transmission between geographical regions was assessed  
 343 separately for the Lineage 2 and Lineage 4 trees using an implementation of  
 344 stochastic mapping on phylogenies (SIMMAP) implemented in the phytools v0.5  
 345 package for R <sup>36,37</sup>. Region of origin was treated as a discrete trait and mapped to  
 346 each tree using the ARD model (which allows each region-to-region transfer rate to  
 347 vary independently) with 100 replicates. The results reported (**Fig. 3d**) are the median  
 348 values for the number of transitions to Vietnam from any other region, summarized  
 349 from 100 replicate mappings for each tree.

350

351 **Esx sequence analysis.** Esx protein sequences were extracted from the H37Rv  
 352 reference genome using Artemis, aligned using Muscle, and subjected to phylogenetic  
 353 inference using PhyML (**Supplementary Fig. 4**). DNA sequences (length 500 bp)  
 354 upstream of each *esx* gene were extracted from the H37Rv reference genome using  
 355 Artemis and aligned and visualised using JalView (**Supplementary Fig. 5**).

356



## 357     **References**

- 358     1.     Zumla, A. *et al.* Eliminating tuberculosis and tuberculosis-HIV co-disease  
359             in the 21st century: key perspectives, controversies, unresolved issues,  
360             and needs. *J Infect Dis* **205 Suppl 2**, S141-6 (2012).
- 361     2.     World Health Organisation. WHO | Global tuberculosis report 2016.  
362             (World Health Organization, 2016).
- 363     3.     Casali, N. *et al.* Evolution and transmission of drug-resistant tuberculosis  
364             in a Russian population. *Nat Genet* **46**, 279-86 (2014).
- 365     4.     Guerra-Assuncao, J.A. *et al.* Large-scale whole genome sequencing of M.  
366             tuberculosis provides insights into transmission in a high prevalence  
367             area. *Elife* **4**(2015).
- 368     5.     Guerra-Assuncao, J.A. *et al.* Recurrence due to Relapse or Reinfection With  
369             Mycobacterium tuberculosis: A Whole-Genome Sequencing Approach in a  
370             Large, Population-Based Cohort With a High HIV Infection Prevalence and  
371             Active Follow-up. *J Infect Dis* (2014).
- 372     6.     Coll, F. *et al.* A robust SNP barcode for typing Mycobacterium tuberculosis  
373             complex strains. *Nat Commun* **5**, 4812 (2014).
- 374     7.     Anh, D.D. *et al.* Mycobacterium tuberculosis Beijing genotype emerging in  
375             Vietnam. *Emerg Infect Dis* **6**, 302-5 (2000).
- 376     8.     Buu, T.N. *et al.* The Beijing genotype is associated with young age and  
377             multidrug-resistant tuberculosis in rural Vietnam. *Int J Tuberc Lung Dis*  
378             **13**, 900-6 (2009).
- 379     9.     Maeda, S. *et al.* Mycobacterium tuberculosis strains spreading in Hanoi,  
380             Vietnam: Beijing sublineages, genotypes, drug susceptibility patterns, and  
381             host factors. *Tuberculosis (Edinb)* **94**, 649-56 (2014).

- 382 10. Nguyen, V.A. *et al.* High prevalence of Beijing and EAI4-VNM genotypes  
383 among *M. tuberculosis* isolates in northern Vietnam: sampling effect, rural  
384 and urban disparities. *PLoS One* **7**, e45553 (2012).
- 385 11. Nguyen, V.A. *et al.* *Mycobacterium tuberculosis* lineages and anti-  
386 tuberculosis drug resistance in reference hospitals across Viet Nam. *BMC*  
387 *Microbiol* **16**, 167 (2016).
- 388 12. Eldholm, V. *et al.* Four decades of transmission of a multidrug-resistant  
389 *Mycobacterium tuberculosis* outbreak strain. *Nat Commun* **6**, 7119  
390 (2015).
- 391 13. Zhang, H. *et al.* Genome sequencing of 161 *Mycobacterium tuberculosis*  
392 isolates from China identifies genes and intergenic regions associated  
393 with drug resistance. *Nat Genet* **45**, 1255-60 (2013).
- 394 14. Merker, M. *et al.* Evolutionary history and global spread of the  
395 *Mycobacterium tuberculosis* Beijing lineage. *Nat Genet* **47**, 242-9 (2015).
- 396 15. Stucki, D. *et al.* *Mycobacterium tuberculosis* lineage 4 comprises globally  
397 distributed and geographically restricted sublineages. *Nat Genet* (2016).
- 398 16. Hanekom, M. *et al.* *Mycobacterium tuberculosis* Beijing genotype: a  
399 template for success. *Tuberculosis (Edinb)* **91**, 510-23 (2011).
- 400 17. Parwati, I., van Crevel, R. & van Soolingen, D. Possible underlying  
401 mechanisms for successful emergence of the *Mycobacterium tuberculosis*  
402 Beijing genotype strains. *Lancet Infect Dis* **10**, 103-11 (2010).
- 403 18. Coscolla, M. & Gagneux, S. Consequences of genomic diversity in  
404 *Mycobacterium tuberculosis*. *Semin Immunol* **26**, 431-44 (2014).
- 405 19. van Laarhoven, A. *et al.* Low induction of proinflammatory cytokines  
406 parallels evolutionary success of modern strains within the

- 407           Mycobacterium tuberculosis Beijing genotype. *Infect Immun* **81**, 3750-6
- 408           (2013).
- 409   20.   Farhat, M.R. *et al.* Genomic analysis identifies targets of convergent
- 410           positive selection in drug-resistant Mycobacterium tuberculosis. *Nat*
- 411           *Genet* **45**, 1183-9 (2013).
- 412   21.   Hazbon, M.H. *et al.* Convergent evolutionary analysis identifies significant
- 413           mutations in drug resistance targets of Mycobacterium tuberculosis.
- 414           *Antimicrob Agents Chemother* **52**, 3369-76 (2008).
- 415   22.   Knudsen, N.P. *et al.* Tuberculosis vaccine with high predicted population
- 416           coverage and compatibility with modern diagnostics. *Proc Natl Acad Sci U*
- 417           *S A* **111**, 1096-101 (2014).
- 418   23.   Baldwin, S.L. *et al.* Intradermal immunization improves protective efficacy
- 419           of a novel TB vaccine candidate. *Vaccine* **27**, 3063-71 (2009).
- 420   24.   Coler, R.N. *et al.* Therapeutic immunization against Mycobacterium
- 421           tuberculosis is an effective adjunct to antibiotic treatment. *J Infect Dis*
- 422           **207**, 1242-52 (2013).
- 423   25.   Uplekar, S., Heym, B., Friocourt, V., Rougemont, J. & Cole, S.T. Comparative
- 424           genomics of Esx genes from clinical isolates of Mycobacterium
- 425           tuberculosis provides evidence for gene conversion and epitope variation.
- 426           *Infect Immun* **79**, 4042-9 (2011).
- 427   26.   Brosch, R. *et al.* A new evolutionary scenario for the Mycobacterium
- 428           tuberculosis complex. *Proc Natl Acad Sci U S A* **99**, 3684-9 (2002).
- 429   27.   Caws, M. *et al.* The influence of host and bacterial genotype on the
- 430           development of disseminated disease with Mycobacterium tuberculosis.
- 431           *PLoS Pathog* **4**, e1000034 (2008).

432 28. Langmead, B. & Salzberg, S.L. Fast gapped-read alignment with Bowtie 2.  
433 *Nat Methods* **9**, 357-9 (2012).

434 29. Li, H. *et al.* The Sequence Alignment/Map format and SAMtools.  
435 *Bioinformatics* **25**, 2078-9 (2009).

436 30. Comas, I. *et al.* Out-of-Africa migration and Neolithic coexpansion of  
437 *Mycobacterium tuberculosis* with modern humans. *Nat Genet* **45**, 1176-82  
438 (2013).

439 31. Pepperell, C.S. *et al.* The role of selection in shaping diversity of natural *M.*  
440 *tuberculosis* populations. *PLoS Pathog* **9**, e1003543 (2013).

441 32. Bradley, P. *et al.* Rapid antibiotic-resistance predictions from genome  
442 sequence data for *Staphylococcus aureus* and *Mycobacterium*  
443 *tuberculosis*. *Nat Commun* **6**, 10063 (2015).

444 33. Stamatakis, A. RAxML version 8: a tool for phylogenetic analysis and post-  
445 analysis of large phylogenies. *Bioinformatics* **30**, 1312-3 (2014).

446 34. Price, M.N., Dehal, P.S. & Arkin, A.P. FastTree 2--approximately maximum-  
447 likelihood trees for large alignments. *PLoS One* **5**, e9490 (2010).

448 35. Ashkenazy, H. *et al.* FastML: a web server for probabilistic reconstruction  
449 of ancestral sequences. *Nucleic Acids Res* **40**, W580-4 (2012).

450 36. Bollback, J.P. SIMMAP: stochastic character mapping of discrete traits on  
451 phylogenies. *BMC Bioinformatics* **7**, 88 (2006).

452 37. Revell, L. phytools: an R package for phylogenetic comparative biology (and  
453 other things). *Methods in Ecology and Evolution* **3**, 217-223 (2012).

454

455

## 456 **Figure Legends**

457 **Figure 1. Circulating *M. tuberculosis* strains in HCMC are divided into multiple**  
 458 **distinct lineages.** (a) Maximum-likelihood phylogeny of HCMC isolates with  
 459 backgrounds shaded by lineage. Exterior rings indicate presence of known  
 460 antimicrobial resistance-associated mutations (coloured by drug, according to legend  
 461 in top right). (b) Frequency distribution of lineages by month. (c) Frequency  
 462 distribution of lineages by patient age group.

463

464 **Figure 2. Properties of lineage subtrees for HCMC *M. tuberculosis* genomes.**

465 (a) Distributions of terminal branch lengths. (b) Mean subtree heights (y-axis;  
 466 measured as mean node-to-tip distances for each subtree) vs subtree size (x-axis;  
 467 number of descendant tips). Shaded region indicates standard error of the mean across  
 468 subtrees of a given size; labels indicate lineage. (c) Stacked area plot showing  
 469 number of clusters (y-axis) within each lineage (coloured as in panel a) identified  
 470 using different maximum patristic distance thresholds to define clusters (x-axis).

471

472 **Figure 3. Phylogenies of *M. tuberculosis* showing relationships between isolates**  
 473 **from HCMC and other locations.** HCMC isolates are coloured grey, isolates from  
 474 four other localised studies are coloured as in panel (d), other locations are shown in  
 475 black. (a) Lineage 1 (n=675 genomes). (b) Lineage 2 (n=1,871 genomes). (c) Lineage  
 476 4 (n=2,066 genomes). (d) Number of transfers between Vietnam and other locations  
 477 predicted by stochastic mapping of locations onto the Lineage 2 and 4 trees.

478

479 **Figure 4. NMR structure of the *esxW* homologue *esxB* (residues 2-100).** Residue  
 480 2 is highlighted in red.

**a**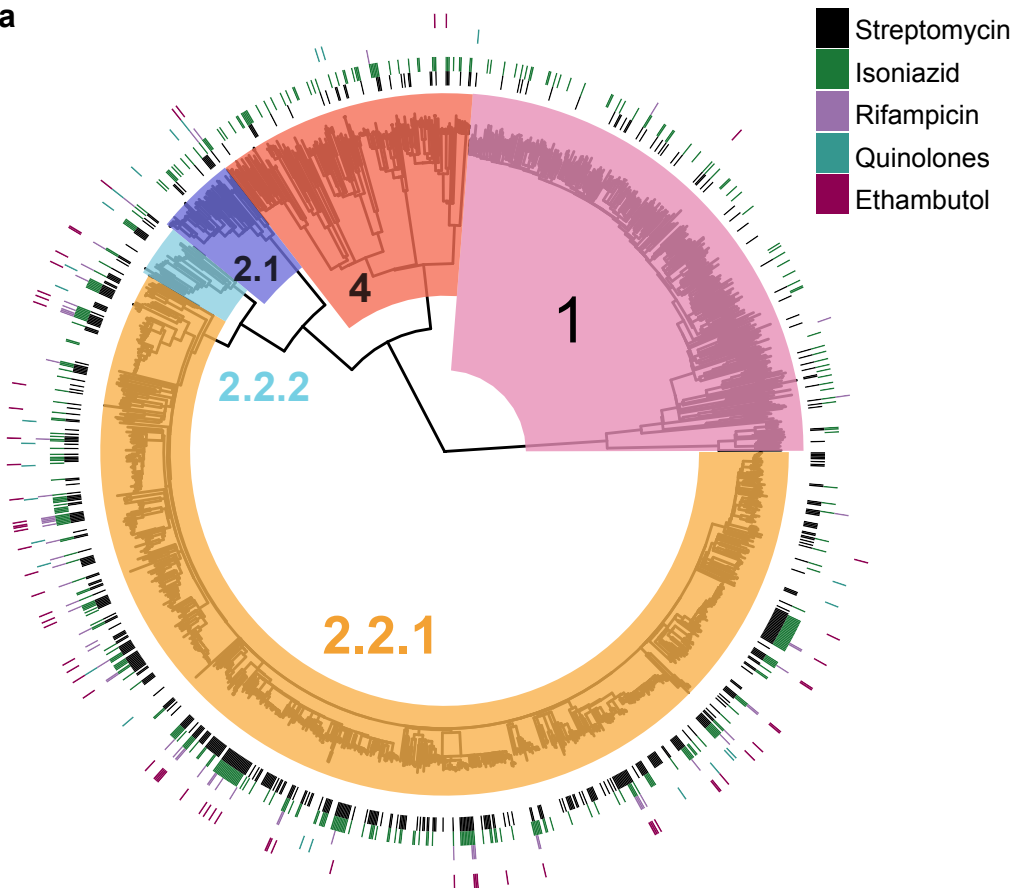**b**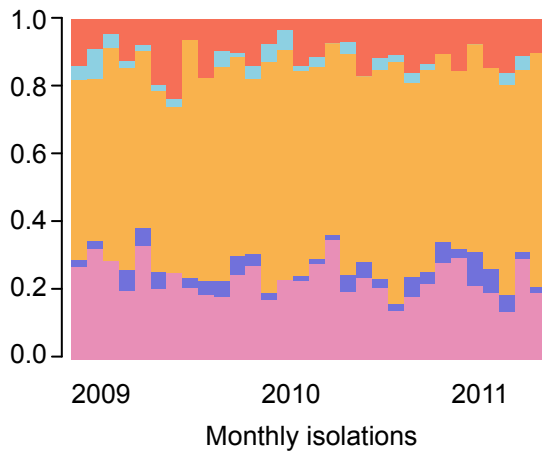**c**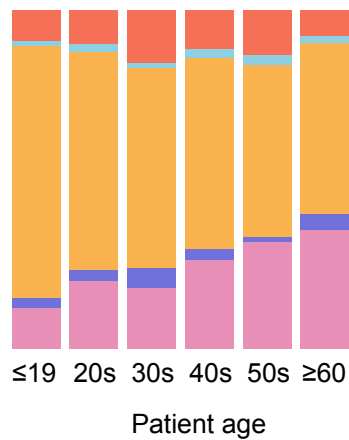

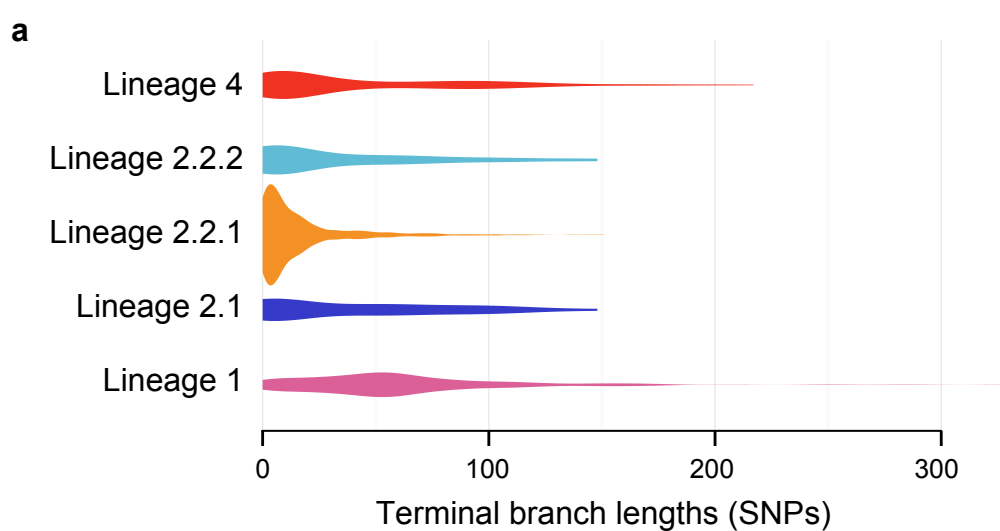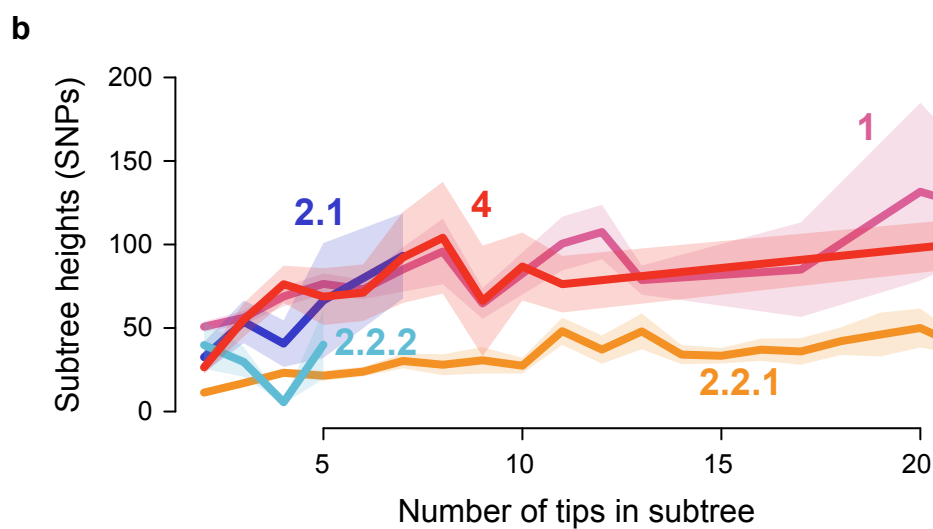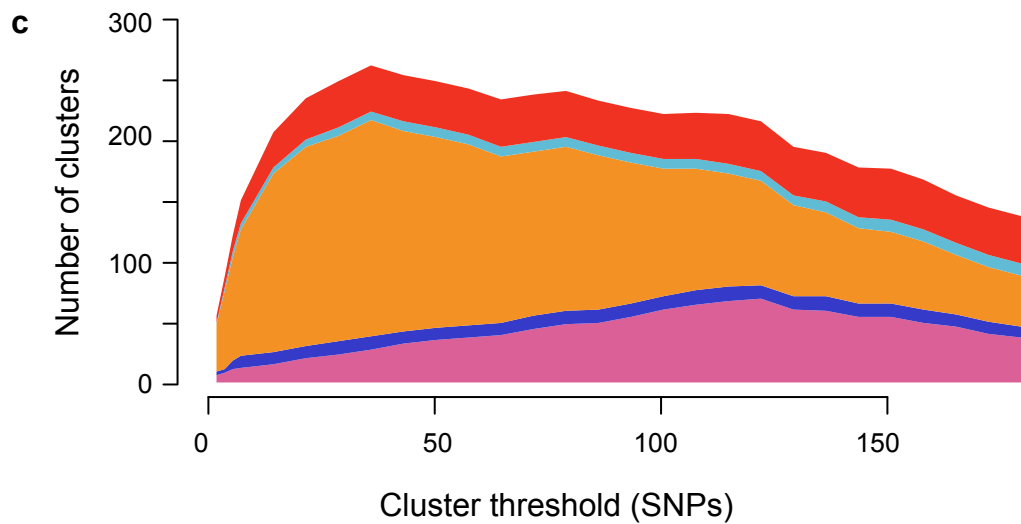

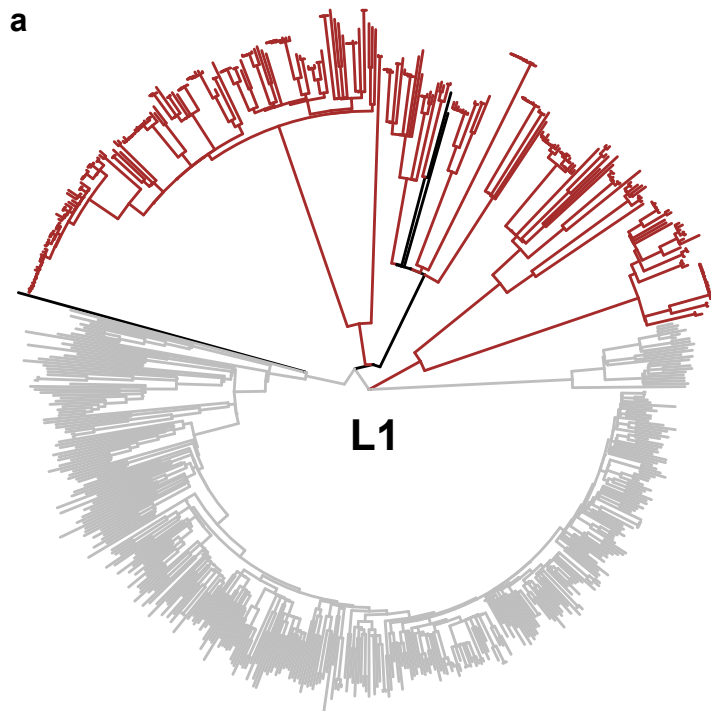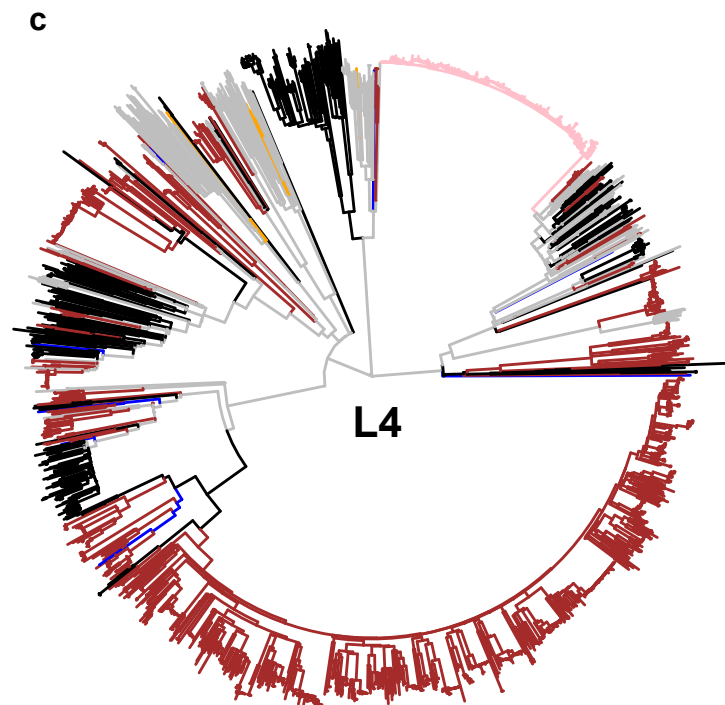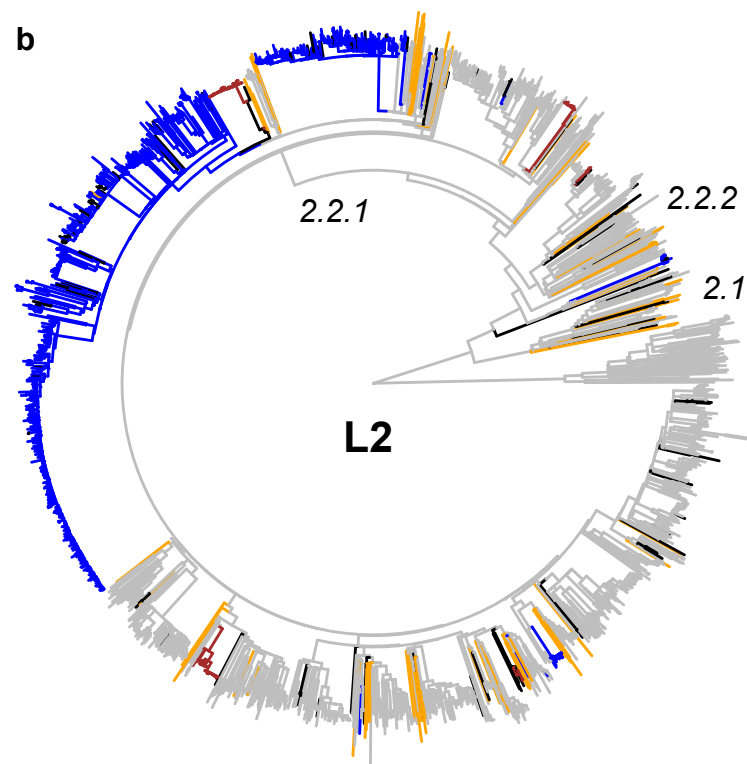

**d**

| Origin          | Lineage |    |
|-----------------|---------|----|
|                 | 2       | 4  |
| China           | 57      | 4  |
| Europe          | 15      | 3  |
| Russia          | 10      | 33 |
| South-East Asia | 9       | 0  |
| Malawi          | 3       | 15 |
| Other Africa    | 7       | 0  |
| Micronesia      | 2       | 0  |
| Southern Asia   | 2       | 0  |
| South America   | 1       | 1  |



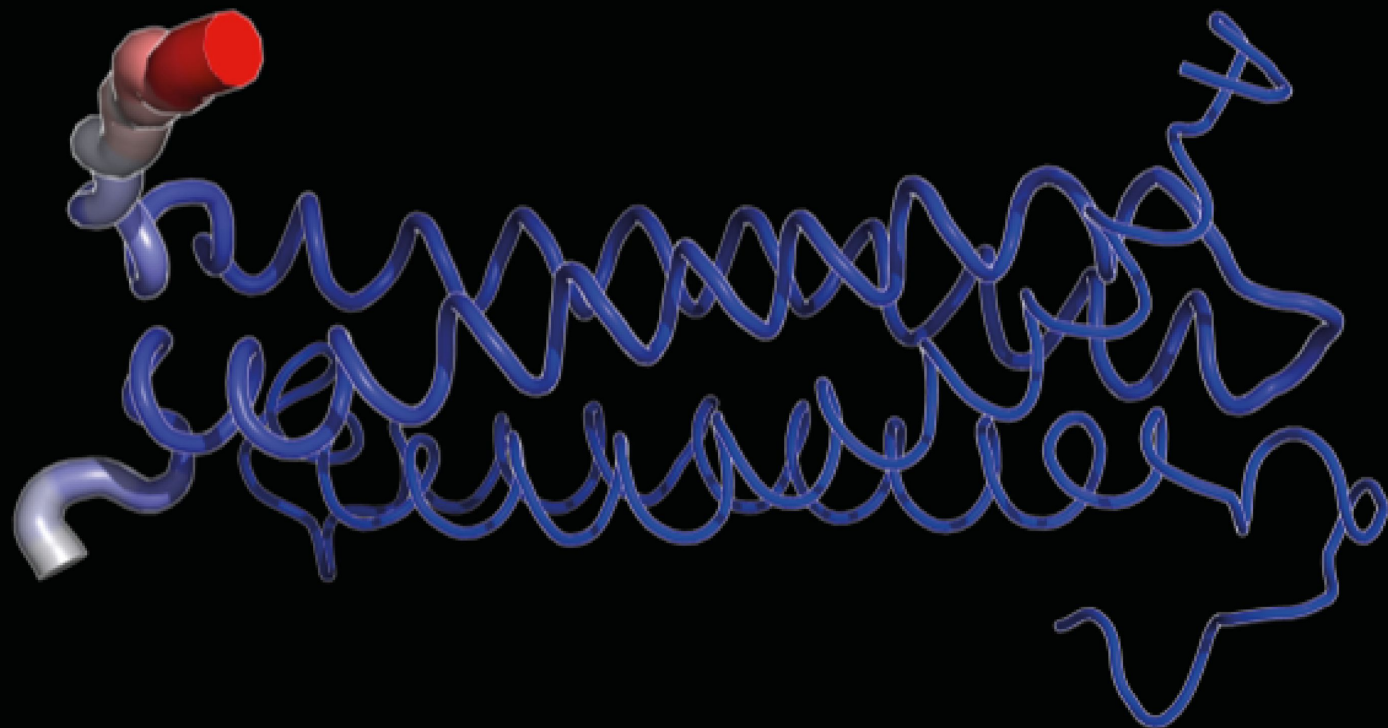

**Table 1. Lineage characteristics for HCMC *M. tuberculosis* isolates, including known antimicrobial resistance mutations identified using Mykrobe Predictor.**

|                      | Lineage     |            |             |            |             |
|----------------------|-------------|------------|-------------|------------|-------------|
|                      | 1           | 2.1        | 2.2.1       | 2.2.2      | 4           |
| <b>Gender</b>        |             |            |             |            |             |
| Female               | 82 (21.1%)  | 9 (15.3%)  | 265 (27.8%) | 10 (25.6%) | 56 (29.2%)  |
| Male                 | 306 (78.9%) | 50 (84.7%) | 692 (72.3%) | 29 (74.4%) | 136 (70.8%) |
| <b>Antimicrobial</b> |             |            |             |            |             |
| Streptomycin         | 48 (12.4%)  | 10 (17.0%) | 426 (44.5%) | 12 (30.8%) | 30 (15.6%)  |
| Isoniazid            | 57 (14.7%)  | 12 (20.3%) | 269 (28.1%) | 9 (23.1%)  | 52 (27.1%)  |
| Rifampicin           | 3 (0.8%)    | 2 (3.4%)   | 58 (6.1%)   | 2 (5.1%)   | 1 (0.5%)    |
| Quinolones           | 1 (0.3%)    | 3 (5.1%)   | 18 (1.9%)   | 2 (5.1%)   | 2 (1.0%)    |
| Ethambutol           | 1 (0.3%)    | 2 (3.4%)   | 60 (6.3%)   | 3 (7.7%)   | 2 (1.0%)    |

**Table 2. Homoplastic non-synonymous SNPs identified as occurring on the Beijing lineage-defining branch and also arising independently within other lineages.**

The number of branches on which each SNP was identified outside the Beijing lineage-defining branch is shown, and the number of such branches that have multiple descendant tips (indicating onward transmission of the SNP) is shown in brackets. HCMC refers to the 1,635 isolates from HCMC, Vietnam; Elsewhere refers to the 3,085 additional isolates from published studies<sup>3-5, 12-14</sup>; trees are shown in Figure 3.

| Mutation     | No. branches outside Beijing lineage (no. transmitted) |           | Function                               |
|--------------|--------------------------------------------------------|-----------|----------------------------------------|
|              | HCMC                                                   | Elsewhere |                                        |
| EsxW-T2A     | 9 (4)                                                  | 10 (6)    | ESX-5 secreted protein (CFP10 homolog) |
| Rv3081-F220L | 2 (1)                                                  | 7 (3)     | hypothetical protein                   |
| GidB-E92D    | 1 (1)                                                  | 0 (0)     | streptomycin resistance                |
